# Supplementary material for: Relationship between the Radial Growth of Two Dominant Coniferous Species and GPP in the Arid Region of Northwest China
Source: MDPI journal article supplement (doi:10.3390/f14071336), 2023-06-29
Supplement: s1 [file s1]

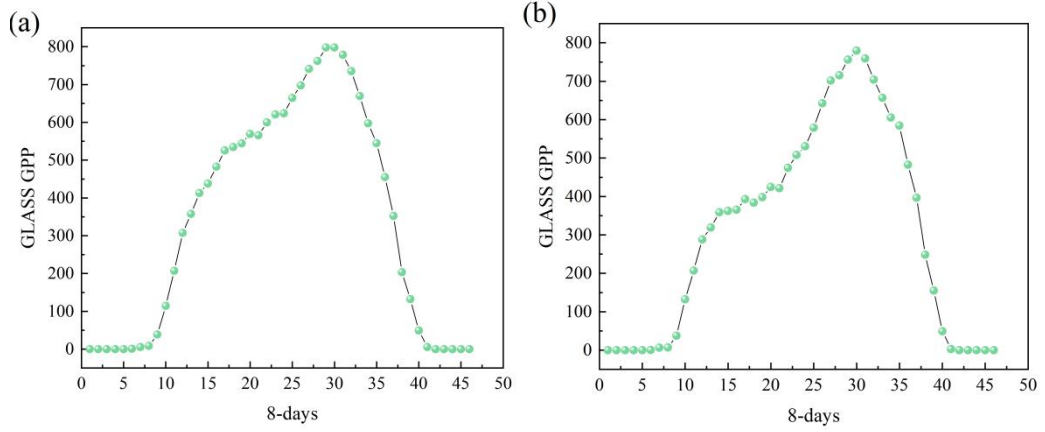

Figure S1. Interannual trend distribution of GLASS GPP (a: spruce b: Chinese pine)

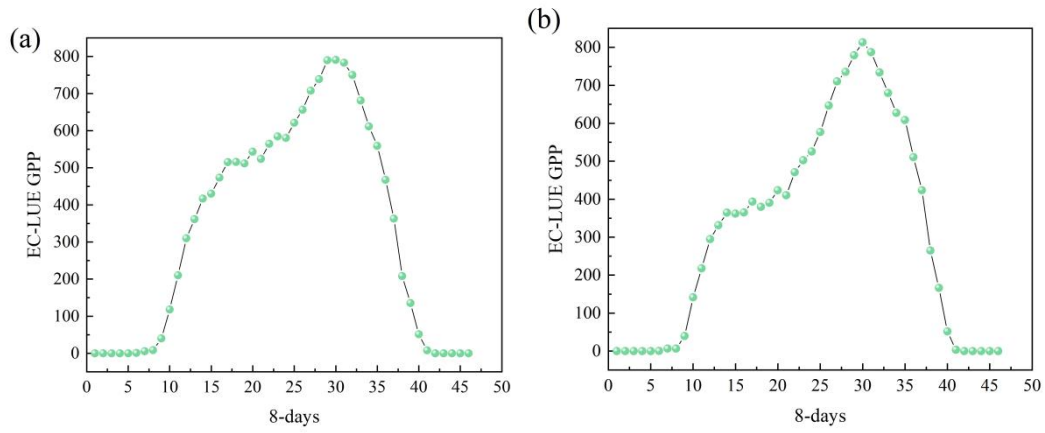

Figure S2. Interannual trend distribution of EC-LUE GPP (a: spruce b: Chinese pine)

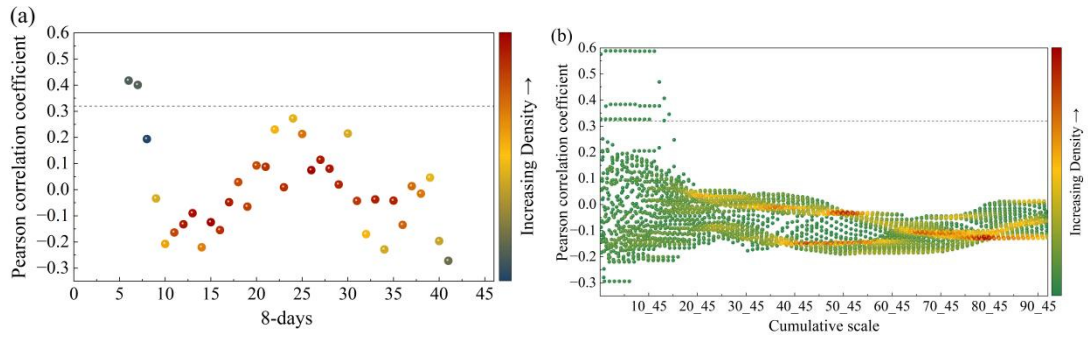

Figure S3. Correlation between the chronology of residuals of spruce tree-ring and EC-LUE GPP (a: 8-days scale b: cumulative scale). The dotted line indicates the significant level of 0.95. (The color of each point maps to the spatial density of the point, with the density gradually increasing from green to red.)

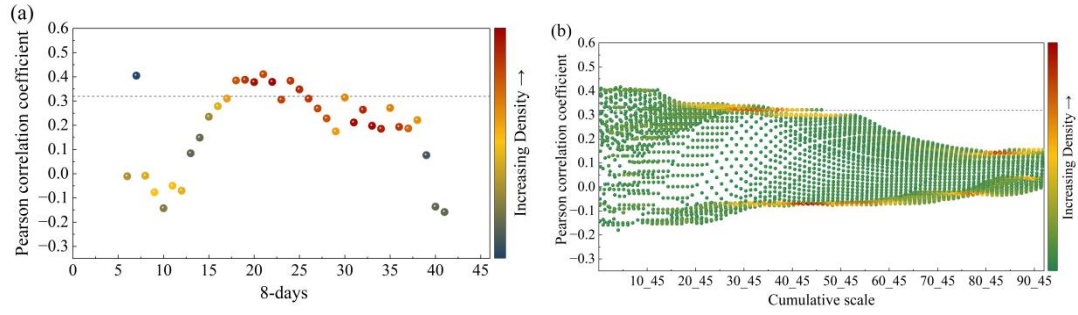

Figure S4. Correlation between the chronology of residuals of Chinese pine tree-ring and EC-LUE GPP (a: 8-days scale b: cumulative scale). The dotted line indicates the significant level of 0.95.(The color of each point maps to the spatial density of the point, with the density gradually increasing from green to red.)
